# Supplementary material for: Sensitive detection of enrofloxacin using an electrochemiluminescence immunosensor based on gold-functionalized C60 and Au@BSA nanoflowers
Source: Royal Society of Chemistry journal article supplement (doi:10.1039/c8nj02764a), 2018-01-01
Supplement: c8nj02764a1.pdf [file c8nj02764a1.pdf]

## Electronic Supplementary Information (ESI)

### **Sensitive detection of enrofloxacin by an electrochemiluminescence immunosensor based on gold-functionalized C<sub>60</sub> and Au@BSA nanoflowers**

Wanlu Chen<sup>a</sup>, Rong Zhou<sup>a</sup>, Xun Yao<sup>b</sup>, Kang Zhao<sup>a</sup>, Anping Deng<sup>a\*</sup>, Jianguo Li<sup>a\*</sup>

<sup>a</sup> The Key Lab of Health Chemistry & Molecular Diagnosis of Suzhou, College of Chemistry, Chemical Engineering & Materials Science, Soochow University, Suzhou 215123, China

<sup>b</sup> Zhangjiagang Entry-Exit Inspection & Quarantine Bureau, Zhangjiagang 215600, P. R. China

---

\* Correspondence authors: J.G. Li, Telephone: +86 51265882195, Fax: +86 51265882195, E-mail address: lijgsd@suda.edu.cn; A.P. Deng, Telephone: +86 51265882362, Fax: +86 51265882362, E-mail address: danganping@suda.edu.cn

## Results and discussion

### *Repeatability and stability of the immunosensor*

Seven assembled electrodes were determined  $10 \text{ ng mL}^{-1}$  Enro in pH 7.4 PBS buffer containing  $0.1 \text{ M K}_2\text{S}_2\text{O}_8$  and the resulting signal was shown in below. The RSD was 4.8% indicated that this sensor has acceptable reproducibility.

**Table S1** ECL signal of 7 assembled electrodes

| Sample        | 1      | 2      | 3      | 4      | 5      | 6      | 7      |
|---------------|--------|--------|--------|--------|--------|--------|--------|
| ECL intensity | 6198.6 | 6206.4 | 6205.4 | 6203.4 | 6192.4 | 6198.8 | 6201.6 |

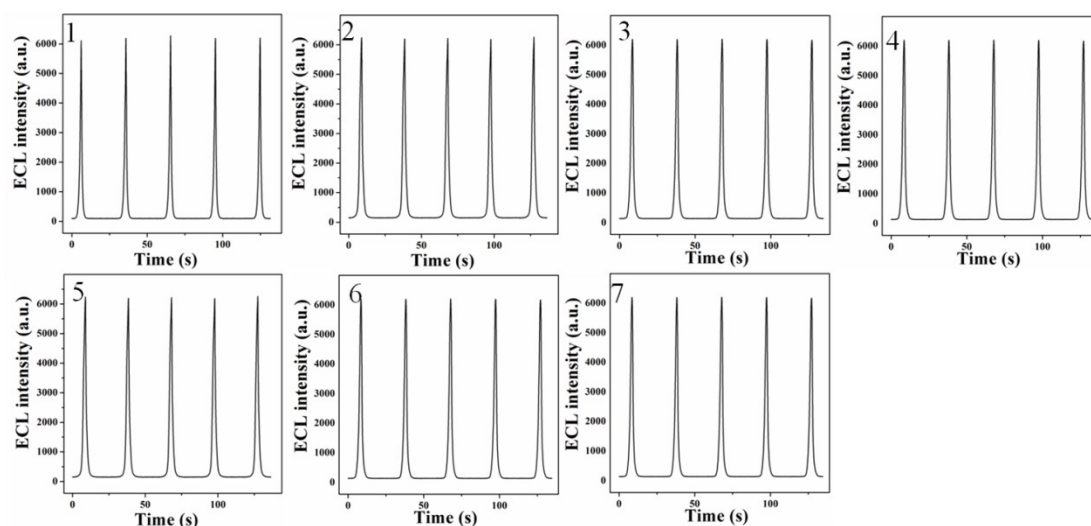

**Fig. S1** Seven assembled electrodes were determined  $10 \text{ ng mL}^{-1}$  Enro in pH 7.4 PBS buffer containing  $0.1 \text{ M K}_2\text{S}_2\text{O}_8$ .
